1 Reef fishes of praia do Tofo and praia da Barra, Inhambane, Mozambique

2

3 Alexander J. Fordyce<sup>1</sup>

4

5

6 <sup>1</sup>Marine Megafauna Association, Praia do Tofo, Inhambane, Mozambique.

7

8

9 Corresponding Author

10 Alexander John Fordyce.

11 Email address: [af1721@my.bristol.ac.uk](mailto:af1721@my.bristol.ac.uk)

12

13

14

15

16

17

18

19

20

21

22

23

24

25

26 Abstract

27 The coral reefs around Praia do Tofo and Praia da Barra, southern Mozambique, are known  
28 for their aggregations of marine megafauna but few studies have examined their reef fish  
29 biodiversity. This study assesses for the first time the ichthyofaunal diversity of the seas  
30 around Praia do Tofo and Praia da Barra. Methods involved underwater observations during  
31 recreational dives between February and September 2016, and the use of photographic  
32 records from 2015. A total of 353 species, representing 79 families, were recorded from 16  
33 patch reefs in the region. The area shows comparable species diversity to others in the  
34 southwestern Indian Ocean, suggesting these reefs are in good condition. But high primary  
35 productivity driven by coastal upwelling may make fish diversity and trophic structure  
36 unreliable measures of the health of these reefs. Future studies investigating the sustainability  
37 of this ecosystem would benefit from utilising a wide range of reef health measures.

38

39

40

41

42

43

44

45

46

47

48

49

50

51 Introduction

52 The ecotourism industry of the Inhambane province in southern Mozambique accounts for  
53 approximately 7% of the province's annual income (Mutimucuo & Meyer, 2011). The  
54 primary tourism hotspots are the Bazaruto Archipelago National Park (BANP) and the  
55 southern area around the Inhambane peninsula. In the latter, the seas around Praia do Tofo &  
56 Praia da Barra (hereafter referred to as PTPB) are particularly important due to their resident  
57 populations of manta rays and whale sharks (Pierce *et al.* 2010; Tibirica *et al.* 2011).  
58 Venables *et al.* (2016) estimate that manta ray tourism alone contributes \$34 million USD per  
59 annum to the province's economy. Scientific research in the PTPB area has thus  
60 predominantly focused on these charismatic species (e.g. Rohner *et al.* 2013; 2014); so far,  
61 very little research has been conducted on the biodiversity of resident fish populations. This  
62 aspect of the PTPB's marine ecosystem is expected to gain value in the future, as has  
63 occurred in the BANP (Schleyer & Celliers, 2005), due to the continued decline of local  
64 megafauna populations (Rohner *et al.* 2013). As of 2014, the United Nations & World  
65 Heritage Convention (2014) recommend that the protected area currently represented by the  
66 BANP be extended south to include the seas around PTPB. Knowledge of the fish  
67 biodiversity of this area will help support this recommendation.

68

69 Species richness information is currently missing from the PTPB seas but this data is vital for  
70 future ecosystem management. Biodiversity data is necessary to identify key biological  
71 components (as per Pereira, 2000), provide a baseline from which ecosystem stability and  
72 function can be assessed (as per Cleland, 2011), and to predict the effects of biodiversity loss  
73 on ecosystem provision (as per Bellwood & Hughes, 2001; Gillibrand, Harries & Mara, 2007;  
74 Maggs *et al.*, 2010). The PTPB area is bordered by the tropical and sub-tropical latitudes of  
75 the southwestern Indian Ocean and are home to a number of different reef habitats likely to

76 support diverse reef fish assemblages. The most common habitats are deepwater, offshore  
77 patch reefs which are characteristic of southern Mozambique and typically have low levels of  
78 coral cover (e.g. Pereira, 2000; Motta *et al.*, 2002; Schleyer & Celliers, 2005). Other marine  
79 ecosystems in the region include mangrove swamps, estuarine reefs and shallow inshore  
80 fringing reefs. This range of reef and coastal environments provide substantial habitat and  
81 nursery grounds for fish species in the area. The PTPB area has a relatively large associated  
82 human population of over 250,000 people (Instituto Nacional de Estatística, 2007), based  
83 primarily in the cities of Maxixe & Inhambane (Fig. 1). But there is little to no management  
84 in place to safeguard the marine ecosystems and the services they provide. This study  
85 constitutes a baseline assessment of fish diversity of the reefs surrounding Praia do Tofo &  
86 Praia da Barra, and highlights the need for further investigations into the state of these  
87 ecosystems.

88

## 89 Materials & Methods

### 90 *Study Site*

91 Praia do Tofo (23° 51.205' S 35° 32.882' E) and Praia da Barra (23° 47.541' S 35° 31.142'  
92 E) harbour a number of shallow fringing coral reefs. However, many of the sites frequented  
93 by the local dive industry are in deeper waters to the north and south. In this study, diversity  
94 was recorded on reefs spanning approximately 40 km along the coast of the Inhambane  
95 province (Fig. 1). A total of 16 reef sites between 1 and 32 m (Table 1) were surveyed  
96 between February and September 2016.

97 *Sampling*

98 The primary method was  
99 underwater observations  
100 during a random swim.  
101 Species were identified  
102 *in situ* if possible and  
103 recorded on an  
104 underwater PVC slate. If  
105 required, a photograph  
106 was taken for subsequent  
107 species identification.  
108 Deep sites (> 8 m) were  
109 surveyed on SCUBA, as  
110 part of a recreational  
111 dive charter operated by  
112 Peri-Peri Divers.  
113 Shallow sites were

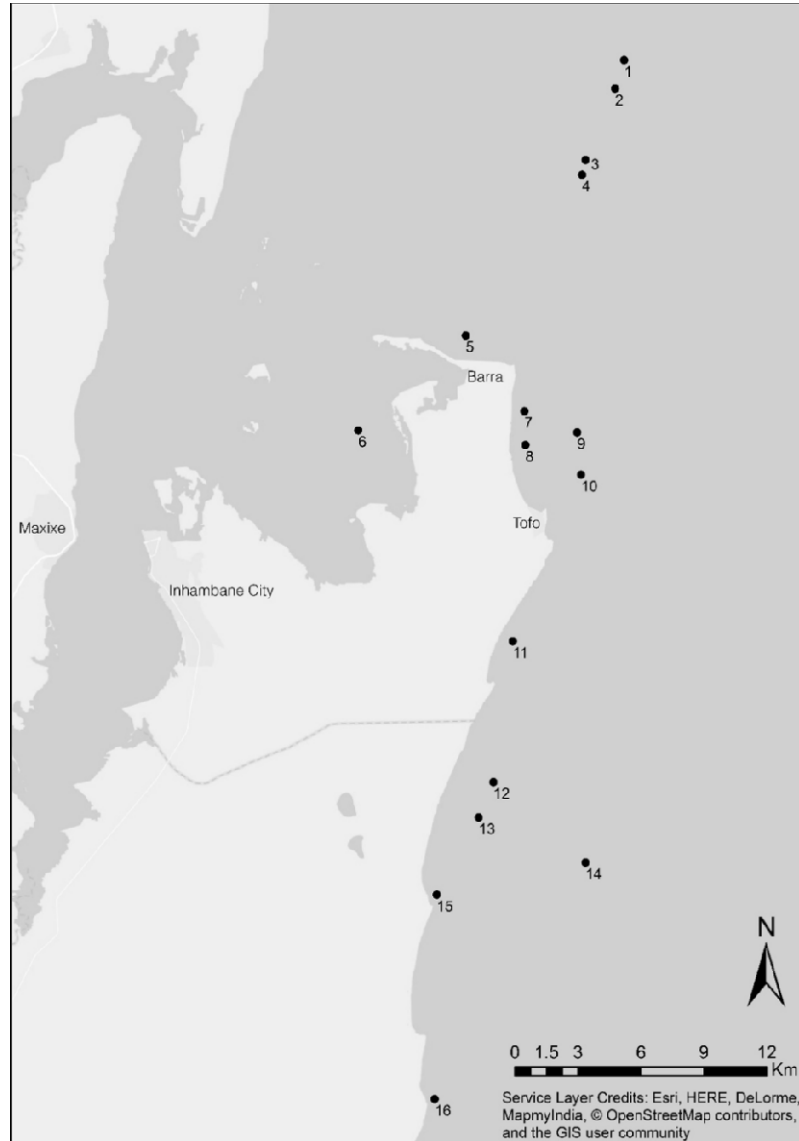

114 **Figure 1.** Map of the study area and its location along the coast of Mozambique  
(inset). Sampled reefs are indicated by (•); their broad characteristics are  
115 described in Table 1.

116 surveys, totalling 2218 minutes of observation time were undertaken (total surveying times  
117 for each site are shown in Table 1). The species richness recorded from underwater  
118 observations was supplemented through the inclusion of species that had been sighted in the  
119 year preceding the survey period, and for which there was photographic evidence available  
120 from local ecotourism and dive operators (e.g. *Mola mola*). The inclusion of solicited data  
121 outside the study period was conducted to represent rare or seasonally restricted species. Data

122 collection was approved by the Maritime Administration of the City of Inhambane and the

**Table 1.** Names and descriptions of sampled reefs, including the underwater survey method used and the amount of time spent surveying each location

| Site Name (Number)          | Site Description                                                                                                                                                                                                                | Sampling Method | Sampling Time (mins) |
|-----------------------------|---------------------------------------------------------------------------------------------------------------------------------------------------------------------------------------------------------------------------------|-----------------|----------------------|
| Amazon (1)                  | Offshore, horseshoe reef with an abundance of azooxanthellate soft corals; 23 – 28 metres.                                                                                                                                      | SCUBA           | 87                   |
| Hospital (2)                | Offshore, southward sloping reef with occasional short pinnacles; 24 – 26 metres.                                                                                                                                               | SCUBA           | 80                   |
| The Office (3)              | Topographically complex offshore reef with an abundance of overhangs and valleys with many encrusting soft corals; 22 – 26 metres.                                                                                              | SCUBA           | 177                  |
| Reggie's (4)                | Tall, offshore reef rising between 4 – 8 metres from the seafloor; reef crests are dominated by large colonies of <i>Tubastrea micranthus</i> ; 22 – 30 metres.                                                                 | SCUBA           | 231                  |
| Buddies (5)                 | Shallow, inshore reef subject to persistent swell and fishing pressure; 8 – 10 metres.                                                                                                                                          | SCUBA           | 97                   |
| The Wall (6)                | Shallow estuarine reef with daily exposure to strong tidal currents; a combination of seagrass, rocky reef and sand patch microhabitats; 0-4 metres.                                                                            | Snorkel         | 70                   |
| Mike's Cupboard (7)         | Submerged sand dune reef, with many potholes and gullies surrounded by sandy reef flats; 12 – 16 metres.                                                                                                                        | SCUBA           | 108                  |
| Salon (8)                   | Shallow inshore reef composed of multiple large pinnacles surrounded by sandy bottom; subject to high turbidity from wave action; 10-14 metres.                                                                                 | SCUBA           | 175                  |
| Sherwood Forest (9)         | Offshore reef just outside of Tofo bay, made of one large and one smaller pinnacle both supporting large populations of <i>Tubastrea micranthus</i> ; 22 – 26 metres                                                            | SCUBA           | 58                   |
| Giants Castle (10)          | Straight north-south reef with an extensive reef flat and deep reef wall; known within the local dive industry as having the best sighting rate for marine megafauna; 27 – 32 metres.                                           | SCUBA           | 214                  |
| Marble Arch (11)            | Inshore reef exposed to minor wave action; large reef flat with a few large potholes and one large rock arch; 14 – 18 metres.                                                                                                   | SCUBA           | 51                   |
| Rob's Bottom (12)           | Very patchy eastward sloping reef that is often subject to high current with high algal cover; 23 – 27 metres.                                                                                                                  | SCUBA           | 158                  |
| Manta Reef (13)             | A large offshore reef, with a large central reef flat; peripheries are characterised by short, steep reef slopes with a number of tall pinnacles; 18 – 24 metres                                                                | SCUBA           | 365                  |
| Outback (14)                | Similar reef shape as Giant's Castle, yet with more small inlets that house a number of deep overhangs and archways; 25 – 30 metres.                                                                                            | SCUBA           | 76                   |
| Coconut Bay (15)            | Shallow inshore rocky reef with small patches of encrusting soft coral and larger swathes of seagrass; 4 – 8 metres.                                                                                                            | Snorkel         | 53                   |
| Paindane Coral Gardens (16) | Small, shallow reef protected from offshore waves by a barrier rock extending from shore; the most abundant coral community in this area, dominated by <i>Sinularia</i> spp. soft coral and corymbose acroporids; 1 – 6 metres. | Snorkel         | 182                  |

123 Ministry of Justice.

124 Estimated richness and regional comparisons

125 To determine the number of conspicuous species missed during the visual census, the Coral  
126 Fish Diversity Index (CFDI) developed by Allen & Werner (2002) was calculated and  
127 compared to the recorded species richness ( $SR_{obs}$ ). The CFDI examines the diversity of six  
128 common and easily observable families as representatives of reef fish species richness. These  
129 families are Acanthuridae, Chaetodontidae, Labridae, Pomacanthidae, Pomacentridae &  
130 Scaridae. In areas  $< 2000 \text{ km}^2$ , a theoretical species richness ( $SR_{theor}$ ) is then generated using  
131 the equation  $SR_{theor} = 3.39(CFDI) - 20.595$  (Allen & Werner, 2002).  $SR_{theor}$  was calculated  
132 for other reef systems in the southwestern Indian Ocean, using published literature, to draw  
133 loose comparisons between the richness of these areas and that observed in the current study  
134 (as per Wickel *et al.* 2014).

135

136 Results

137 A total of 353 species, representing 79 families, were recorded in the current study from 328  
138 visual observations and 25 past photographic records (Table 2). Of the total number of  
139 species recorded, 27 were cartilaginous fish and 326 were bony fish. The CFDI-generated

**Table 2.** Reef fish species checklist from the PTPB area of Mozambique, sighted through surveys (S) and photographic records (P). Where a species' trophic category has been assumed from a congener species, it is labelled with a '\*'.

140  $SR_{theor}$  was 329, lower than the observed species richness (Table 3).

| <b>FAMILIES - Species - Authors</b>                      | <b>Sighting Record</b> | <b>Trophic Category</b> |
|----------------------------------------------------------|------------------------|-------------------------|
| <hr/>                                                    |                        |                         |
| ACANTHURIDAE                                             |                        |                         |
| <i>Acanthurus dussumieri</i> Cuvier & Valenciennes, 1835 | S                      | H                       |
| <i>Acanthurus leucosternon</i> Bennett, 1833             | S                      | H                       |
| <i>Acanthurus lineatus</i> Linnaeus, 1758                | S                      | H                       |

| <b>FAMILIES - Species - Authors</b>                     | <b>Sighting Record</b> | <b>Trophic Category</b> |
|---------------------------------------------------------|------------------------|-------------------------|
| <i>Acanthurus nigrofuscus</i> Forsskål, 1775            | S                      | H                       |
| <i>Acanthurus tennentii</i> Günther, 1861               | S                      | H                       |
| <i>Acanthurus triostegus</i> Linnaeus, 1758             | S                      | H                       |
| <i>Acanthurus xanthopterus</i> Valenciennes, 1835       | S                      | H                       |
| <i>Ctenochaetus binotatus</i> Randall, 1955             | S                      | H                       |
| <i>Ctenochaetus striatus</i> Quoy & Gaimard, 1825       | S                      | H                       |
| <i>Ctenochaetus truncates</i> Randall & Clements, 2001  | S                      | H                       |
| <i>Naso brachycentron</i> Valenciennes, 1835            | S                      | H                       |
| <i>Naso brevirostris</i> Cuvier, 1829                   | S                      | H                       |
| <i>Naso elegans</i> Rüppell, 1829                       | S                      | H                       |
| <i>Paracanthurus hepatus</i> Linné, 1766                | S                      | DPL                     |
| <i>Zebrasoma desjardini</i> Bennett, 1836               | S                      | H                       |
| <i>Zebrasoma gemmatum</i> Valenciennes, 1835            | S                      | H                       |
| <i>Zebrasoma scopas</i> Cuvier, 1829                    | S                      | H                       |
| <b>AMBASSIDAE</b>                                       |                        |                         |
| <i>Ambassis natalensis</i> Gilchrist & Thompson, 1908   | S                      | DC                      |
| <b>ANTENNARIIDAE</b>                                    |                        |                         |
| <i>Antennarius coccineus</i> Lesson, 1831               | S                      | Pi                      |
| <i>Antennarius commerson</i> Lacepède, 1798             | S                      | Pi                      |
| <i>Antennarius nummifer</i> Cuvier, 1817                | P                      | Pi                      |
| <b>APOGONIDAE</b>                                       |                        |                         |
| <i>Cheilodipterus quinquelineatus</i> Cuvier, 1828      | S                      | NC                      |
| <i>Ostorhinchus angustatus</i> Smith & Radcliffe, 1911  | S                      | BSI                     |
| <i>Ostorhinchus flagelliferus</i> Smith, 1961           | S                      | BSI                     |
| <i>Ostorhinchus fleurieu</i> Lacepède, 1802             | S                      | BSI*                    |
| <i>Pristiapogon kallopterus</i> Bleeker, 1856           | S                      | NC                      |
| <i>Taeniamia mozambiquensis</i> Smith, 1961             | S                      | NA                      |
| <b>ATHERINIDAE</b>                                      |                        |                         |
| <i>Atherinomorus lacunosus</i> Forster, 1801            | S                      | NPL                     |
| <b>AULOSTOMIDAE</b>                                     |                        |                         |
| <i>Aulostomus chinensis</i> Linnaeus, 1766              | S                      | Pi                      |
| <b>BALISTIDAE</b>                                       |                        |                         |
| <i>Balistapus undulatus</i> Park, 1797                  | S                      | DC                      |
| <i>Balistoides conspicillum</i> Bloch & Schneider, 1801 | S                      | DC                      |
| <i>Balistoides viridescens</i> Bloch & Schneider, 1801  | S                      | DC                      |



| <b>FAMILIES - Species - Authors</b>                                       | <b>Sighting Record</b> | <b>Trophic Category</b> |
|---------------------------------------------------------------------------|------------------------|-------------------------|
| <i>Odonus niger</i> Rüppell, 1836                                         | S                      | DC                      |
| <i>Pseudobalistes flavimarginatus</i> Rüppell, 1829                       | P                      | DC                      |
| <i>Pseudobalistes fuscus</i> Bloch & Schneider, 1801                      | S                      | DC                      |
| <i>Rhinecanthus aculeatus</i> Linnaeus, 1758                              | S                      | DC                      |
| <i>Rhinecanthus rectangulus</i> Bloch & Schneider, 1801                   | S                      | O                       |
| <i>Sufflamen bursa</i> Bloch & Schneider, 1801                            | S                      | DC                      |
| <i>Sufflamen fraenatum</i> Latreille, 1804                                | S                      | DC                      |
| <i>Xanthichthys lineopunctatus</i> Hollard, 1854                          | S                      | DC*                     |
| <b>BLENNIIDAE</b>                                                         |                        |                         |
| <i>Aspidontus dussumieri</i> Valenciennes, 1836                           | S                      | H                       |
| <i>Aspidontus taeniatus</i> Quoy & Gaimard, 1834                          | S                      | DC                      |
| <i>Aspidontus tractus</i> Fowler, 1903                                    | S                      | DC                      |
| <i>Cirripectes stigmaticus</i> Strasburg & Schultz, 1953                  | S                      | H                       |
| <i>Ecsenius midas</i> Starck, 1969                                        | S                      | H                       |
| <i>Istiblennius edentulous</i> Forster & Schneider, 1801                  | S                      | H                       |
| <i>Plagiotremus rhinorhynchos</i> Bleeker, 1852                           | S                      | NPL                     |
| <i>Plagiotremus tapeinosoma</i> Bleeker, 1857                             | S                      | O                       |
| <b>BOTHIDAE</b>                                                           |                        |                         |
| <i>Bothus mancus</i> Broussonet, 1782                                     | S                      | DC                      |
| <i>Bothus pantherinus</i> Rüppell, 1830                                   | S                      | NC                      |
| <b>CAESIONIDAE</b>                                                        |                        |                         |
| <i>Caesio varilineata</i> Carpenter, 1987                                 | S                      | DPL                     |
| <i>Caesio xanthalytos</i> Holleman, Connell & Carpenter, 2013             | S                      | DPL*                    |
| <i>Caesio xanthonata</i> Bleeker, 1853                                    | S                      | DPL                     |
| <i>Pterocaesio marri</i> Schultz, Herald, Lachner, Welander & Woods, 1953 | S                      | DPL                     |
| <i>Pterocaesio tile</i> Cuvier & Valenciennes, 1830                       | S                      | DPL                     |
| <b>CALLIONMYIDAE</b>                                                      |                        |                         |
| <i>Neosynchiropus stellatus</i> Smith, 1963                               | S                      | DC                      |
| <b>CARANGIDAE</b>                                                         |                        |                         |
| <i>Alectis ciliaris</i> Bloch, 1787                                       | P                      | DC                      |
| <i>Alectis indica</i> Rüppell, 1830                                       | P                      | DC                      |
| <i>Caranx bucculentus</i> Alleyne & Macleay, 1877                         | S                      | DC                      |
| <i>Caranx heberi</i> Bennett, 1830                                        | S                      | DC                      |
| <i>Caranx ignobilis</i> Forsskål, 1775                                    | S                      | DC                      |
| <i>Caranx melampygus</i> Cuvier, 1833                                     | S                      | DC                      |

| <b>FAMILIES - Species - Authors</b>                   | <b>Sighting Record</b> | <b>Trophic Category</b> |
|-------------------------------------------------------|------------------------|-------------------------|
| <i>Caranx sexfasciatus</i> Quoy & Gaimard, 1825       | S                      | Pi                      |
| <i>Elagatis bipinnulata</i> Quoy & Gaimard, 1825      | S                      | DC                      |
| <i>Gnathanodon speciosus</i> Forsskål, 1775           | S                      | DC                      |
| <i>Seriola lalandi</i> Valenciennes, 1833             | S                      | DC                      |
| <b>CARCHARHINIDAE</b>                                 |                        |                         |
| <i>Carcharhinus amblyrhynchos</i> Bleeker, 1856       | S                      | Pi                      |
| <i>Carcharhinus leucas</i> Müller & Henle, 1839       | P                      | DC                      |
| <i>Carcharhinus limbatus</i> Müller & Henle, 1839     | S                      | Pi                      |
| <i>Carcharhinus melanopterus</i> Quoy & Gaimard, 1824 | S                      | Pi                      |
| <i>Carcharhinus obscurus</i> Lesueur, 1818            | S                      | DC                      |
| <i>Triaenodon obesus</i> Rüppell, 1837                | S                      | DC                      |
| <b>CENTRISCIDAE</b>                                   |                        |                         |
| <i>Aeoliscus strigatus</i> Günther, 1861              | P                      | DC                      |
| <b>CHAETODONTIDAE</b>                                 |                        |                         |
| <i>Chaetodon auriga</i> Forsskål, 1775                | S                      | BSI                     |
| <i>Chaetodon blackburnii</i> Desjardins, 1836         | S                      | BSI                     |
| <i>Chaetodon dolosus</i> Ahl, 1923                    | S                      | BSI                     |
| <i>Chaetodon guttatissimus</i> Bennett, 1833          | S                      | BSI                     |
| <i>Chaetodon interruptus</i> Ahl, 1923                | S                      | BSI                     |
| <i>Chaetodon kleinii</i> Bloch, 1790                  | S                      | BSI                     |
| <i>Chaetodon lineolatus</i> Cuvier, 1831              | S                      | BSI                     |
| <i>Chaetodon lunula</i> Lacepède, 1802                | S                      | BSI                     |
| <i>Chaetodon madagaskariensis</i> Ahl, 1923           | S                      | BSI                     |
| <i>Chaetodon melannotus</i> Bloch & Schneider, 1801   | S                      | BSI                     |
| <i>Chaetodon meyeri</i> Bloch & Schneider, 1801       | S                      | BSI                     |
| <i>Chaetodon trifascialis</i> Quoy & Gaimard, 1825    | S                      | BSI                     |
| <i>Chaetodon xanthurus</i> Bleeker, 1857              | S                      | BSI                     |
| <i>Forcipiger flavissimus</i> Jordan & McGregor, 1898 | S                      | BSI                     |
| <i>Hemitaurichthys zoster</i> Bennett, 1831           | S                      | DPL                     |
| <i>Heniochus acuminatus</i> Linnaeus, 1758            | S                      | BSI                     |
| <i>Heniochus diphreutes</i> Jordan, 1903              | S                      | DPL                     |
| <i>Heniochus monoceros</i> Cuvier, 1831               | S                      | BSI                     |
| <b>CIRRHITIDAE</b>                                    |                        |                         |
| <i>Cirrhitichthys oxycephalus</i> Bleeker, 1855       | S                      | DC                      |
| <i>Cyprinocirrhites polyactis</i> Bleeker, 1874       | S                      | DPL                     |

| <b>FAMILIES - Species - Authors</b>                          | <b>Sighting Record</b> | <b>Trophic Category</b> |
|--------------------------------------------------------------|------------------------|-------------------------|
| <i>Oxycirrhites typus</i> Bleeker, 1857                      | P                      | DPL                     |
| <i>Paracirrhites arcatus</i> Cuvier, 1829                    | S                      | DC                      |
| <i>Paracirrhites forsteri</i> Schneider, 1801                | S                      | DC                      |
| <b>CLINIDAE</b>                                              |                        |                         |
| <i>Clinus venustris</i> Gilchrist & Thompson, 1908           | S                      | NA                      |
| <i>Pavoclinus laurentii</i> Gilchrist & Thompson, 1908       | S                      | NA                      |
| <b>CLUPEIDAE</b>                                             |                        |                         |
| <i>Gilchristella aestuaria</i> Gilchrist, 1913               | S                      | DPL                     |
| <b>CONGRIDAE</b>                                             |                        |                         |
| <i>Heteroconger hassi</i> Klausewitz & Eibl-Eibesfeldt, 1959 | S                      | NC                      |
| <b>DACTYLOPTERIDAE</b>                                       |                        |                         |
| <i>Dactyloptena orientalis</i> Cuvier, 1829                  | S                      | NC                      |
| <b>DASYATIDAE</b>                                            |                        |                         |
| <i>Dasyatis microps</i> Annandale, 1908                      | S                      | NC*                     |
| <i>Himantura jenkinsii</i> Annandale, 1909                   | S                      | NC                      |
| <i>Himantura uarnak</i> Gmelin, 1789                         | S                      | NC                      |
| <i>Neotrygon kuhlii</i> Müller & Henle, 1841                 | S                      | NC                      |
| <i>Taeniura lymma</i> Forsskål, 1775                         | P                      | NC                      |
| <i>Taeniura meyeni</i> Müller & Henle, 1841                  | S                      | NC                      |
| <b>DIODONTIDAE</b>                                           |                        |                         |
| <i>Diodon holocanthus</i> Linnaeus, 1758                     | S                      | NC                      |
| <i>Diodon hystrix</i> Linnaeus, 1758                         | S                      | NC                      |
| <i>Diodon liturosus</i> Shaw, 1804                           | S                      | NC                      |
| <b>ECHENEIDAE</b>                                            |                        |                         |
| <i>Echeneis naucrates</i> Linnaeus, 1758                     | S                      | NC                      |
| <b>ENGRAULIDAE</b>                                           |                        |                         |
| <i>Thryssa vitrirostris</i> Gilchrist & Thompson, 1908       | S                      | DPL                     |
| <b>EPHIPPIDAE</b>                                            |                        |                         |
| <i>Platax teira</i> Forsskål, 1775                           | S                      | O                       |
| <b>FISTULARIIDAE</b>                                         |                        |                         |
| <i>Fistularia commersonii</i> Rüppell, 1838                  | S                      | Pi                      |
| <b>GERREIDAE</b>                                             |                        |                         |
| <i>Gerres longirostris</i> Lacepède, 1801                    | S                      | DC                      |
| <b>GINGLYMOSTOMATIDAE</b>                                    |                        |                         |
| <i>Nebrius ferrugineus</i> Lesson, 1831                      | P                      | NC                      |

| <b>FAMILIES - Species - Authors</b>                   | <b>Sighting Record</b> | <b>Trophic Category</b> |
|-------------------------------------------------------|------------------------|-------------------------|
| <b>GOBIIDAE</b>                                       |                        |                         |
| <i>Amblyeleotris steinitzi</i> Klausewitz, 1974       | S                      | DC                      |
| <i>Amblyeleotris wheeleri</i> Polunin & Lubbock, 1977 | S                      | DC*                     |
| <i>Caffrogobius saldanha</i> Barnard, 1927            | S                      | NA                      |
| <i>Valenciennea strigata</i> Broussonet, 1782         | S                      | DC                      |
| <b>HAEMULIDAE</b>                                     |                        |                         |
| <i>Diagramma pictum</i> Thunberg, 1792                | S                      | DC                      |
| <i>Plectorhinchus flavomaculatus</i> Cuvier, 1830     | S                      | NC                      |
| <i>Plectorhinchus gaterinus</i> Forsskål, 1775        | S                      | NC                      |
| <i>Plectorhinchus playfairi</i> Pellegrin, 1914       | S                      | DC                      |
| <i>Plectorhinchus vittatus</i> Linnaeus, 1758         | S                      | NC                      |
| <b>HEMIRAMPHIDAE</b>                                  |                        |                         |
| <i>Hyporhamphus affinis</i> Günther, 1866             | S                      | O                       |
| <b>HOLOCENTRIDAE</b>                                  |                        |                         |
| <i>Myripristis adusta</i> Bleeker, 1853               | S                      | NPL                     |
| <i>Myripristis berndti</i> Jordan & Evermann, 1903    | S                      | NC                      |
| <i>Myripristis botche</i> Cuvier, 1829                | S                      | NC                      |
| <i>Myripristis murdjan</i> Forsskål, 1775             | S                      | NPL                     |
| <i>Myripristis vittata</i> Valenciennes, 1831         | S                      | NPL                     |
| <i>Neoniphon samara</i> Forsskål, 1775                | S                      | NC                      |
| <i>Pagellus natalensis</i> Steindachner, 1903         | S                      | O                       |
| <i>Sargocentron caudimaculatum</i> Rüppell, 1838      | S                      | NC                      |
| <i>Sargocentron diadema</i> Lacepède, 1802            | S                      | NC                      |
| <i>Sargocentron spiniferum</i> Forsskål, 1775         | S                      | NC                      |
| <b>ISTIOPHORIDAE</b>                                  |                        |                         |
| <i>Istiompax indica</i> Cuvier, 1832                  | S                      | Pi                      |
| <i>Istiophorus platypterus</i> Shaw, 1792             | P                      | Pi                      |
| <i>Makaira nigricans</i> Lacepède, 1802               | P                      | Pi                      |
| <b>KYPHOSIDAE</b>                                     |                        |                         |
| <i>Kyphosus vaigiensis</i> Quoy & Gaimard, 1825       | S                      | H                       |
| <b>LABRIDAE</b>                                       |                        |                         |
| <i>Anampses meleagrides</i> Valenciennes, 1840        | S                      | DC                      |
| <i>Bodianus anthioides</i> Bennett, 1832              | S                      | DC                      |
| <i>Bodianus axillaris</i> Bennett, 1832               | S                      | DC                      |
| <i>Bodianus diana</i> Lacepède, 1801                  | S                      | DC                      |

| <b>FAMILIES - Species - Authors</b>                 | <b>Sighting Record</b> | <b>Trophic Category</b> |
|-----------------------------------------------------|------------------------|-------------------------|
| <i>Bodianus trilineatus</i> Fowler, 1934            | S                      | DC*                     |
| <i>Anampses twistii</i> Bleeker, 1856               | S                      | DC                      |
| <i>Cheilinus trilobatus</i> Lacepède, 1801          | S                      | DC                      |
| <i>Cheilinus undulates</i> Rüppell, 1835            | S                      | DC                      |
| <i>Cheilio inermis</i> Forsskål, 1775               | S                      | DC                      |
| <i>Coris aygula</i> Lacepède, 1801                  | S                      | DC                      |
| <i>Coris caudimacula</i> Quoy & Gaimard, 1834       | S                      | DC                      |
| <i>Coris cuvieri</i> Bennett, 1831                  | S                      | DC                      |
| <i>Coris formosa</i> Bennett, 1830                  | S                      | DC                      |
| <i>Gomphosus caeruleus</i> Lacepède, 1801           | S                      | DC                      |
| <i>Gomphosus varius</i> Lacepède, 1801              | S                      | DC                      |
| <i>Halichoeres cosmetus</i> Randall & Smith, 1982   | S                      | DC                      |
| <i>Halichoeres hortulanus</i> Lacepède, 1801        | S                      | DC                      |
| <i>Halichoeres iridis</i> Randall & Smith, 1982     | S                      | DC                      |
| <i>Halichoeres lapillus</i> Smith, 1947             | S                      | DC                      |
| <i>Halichoeres nebulosus</i> Valenciennes, 1839     | S                      | DC                      |
| <i>Halichoeres scapularis</i> Bennett, 1832         | S                      | DC                      |
| <i>Halichoeres zeylonicus</i> Bennett, 1833         | S                      | DC                      |
| <i>Halichoeres zulu</i> Randall & King, 2010        | S                      | DC                      |
| <i>Labroides bicolor</i> Fowler & Bean, 1928        | S                      | DC                      |
| <i>Labroides dimidiatus</i> Valenciennes, 1839      | S                      | DC                      |
| <i>Macropharyngodon bipartitus</i> Smith, 1957      | S                      | DC                      |
| <i>Macropharyngodon cyanoguttatus</i> Randall, 1978 | S                      | DC*                     |
| <i>Novaculichthys taeniourus</i> Lacepède, 1801     | S                      | DC                      |
| <i>Pseudocoris heteroptera</i> Bleeker, 1857        | S                      | DC                      |
| <i>Thalassoma amblycephalum</i> Bleeker, 1856       | S                      | DC                      |
| <i>Thalassoma hebraicum</i> Lacepède, 1801          | S                      | DC                      |
| <i>Thalassoma lunare</i> Linnaeus, 1758             | S                      | DC                      |
| <b>LUTJANIDAE</b>                                   |                        |                         |
| <i>Aprion virescens</i> Valenciennes, 1830          | S                      | Pi                      |
| <i>Lutjanus ehrenbergii</i> Peters, 1869            | S                      | NC                      |
| <i>Lutjanus fulviflamma</i> Forsskål, 1775          | S                      | NC                      |
| <i>Lutjanus gibbus</i> Forsskål, 1775               | S                      | NC                      |
| <i>Lutjanus kasmira</i> Forsskål, 1775              | S                      | NC                      |
| <i>Lutjanus lutjanus</i> Bloch, 1790                | S                      | NC                      |

| <b>FAMILIES - Species - Authors</b>                   | <b>Sighting Record</b> | <b>Trophic Category</b> |
|-------------------------------------------------------|------------------------|-------------------------|
| <i>Lutjanus monostigma</i> Cuvier, 1828               | S                      | NC                      |
| <i>Lutjanus notatus</i> Cuvier, 1828                  | S                      | NC                      |
| <i>Lutjanus rivulatus</i> Cuvier, 1828                | S                      | NC                      |
| <i>Lutjanus sebae</i> Cuvier, 1816                    | S                      | NC                      |
| <i>Macolor niger</i> Forsskål, 1775                   | S                      | NC                      |
| <i>Paracaesio sordida</i> Abe & Shinohara, 1962       | S                      | DPL                     |
| <b>MALACANTHIDAE</b>                                  |                        |                         |
| <i>Malacanthus brevisrostris</i> Guichenot, 1848      | S                      | DC                      |
| <b>MICRODESMIDAE</b>                                  |                        |                         |
| <i>Nemateleotris magnifica</i> Fowler, 1938           | S                      | NPL                     |
| <i>Ptereleotris evides</i> Jordan & Hubbs, 1925       | S                      | NPL                     |
| <i>Ptereleotris heteroptera</i> Bleeker, 1855         | S                      | DPL                     |
| <b>MOLIDAE</b>                                        |                        |                         |
| <i>Mola mola</i> Linnaeus, 1758                       | P                      | DC                      |
| <b>MONACANTHIDAE</b>                                  |                        |                         |
| <i>Aluterus scriptus</i> Osbeck, 1765                 | S                      | O                       |
| <i>Acreichthys tomentosus</i> Linnaeus, 1758          | S                      | DC                      |
| <i>Cantherhines fronticinctus</i> Günther, 1867       | S                      | BSI                     |
| <i>Cantherhines pardalis</i> Rüppell, 1837            | S                      | BSI                     |
| <i>Pervagor janthinosoma</i> Bleeker, 1854            | S                      | NA                      |
| <i>Stephanolepis auratus</i> Castelnau, 1861          | S                      | NA                      |
| <b>MONOCENTRIDAE</b>                                  |                        |                         |
| <i>Cleidopus gloriamaris</i> De Vis, 1882             | P                      | NA                      |
| <b>MONODACTYLIDAE</b>                                 |                        |                         |
| <i>Monodactylus argenteus</i> Linnaeus, 1758          | S                      | DPL                     |
| <b>MULLIDAE</b>                                       |                        |                         |
| <i>Mulloidichthys ayliffe</i> Uiblein, 2011           | S                      | NC                      |
| <i>Mulloidichthys flavolineatus</i> Lacepède, 1801    | S                      | NC                      |
| <i>Mulloidichthys vanicolensis</i> Valenciennes, 1831 | S                      | NC                      |
| <i>Parupeneus barberinus</i> Lacepède, 1801           | S                      | DC                      |
| <i>Parupeneus indicus</i> Shaw, 1803                  | S                      | DC                      |
| <i>Parupeneus macronemus</i> Lacepède, 1801           | S                      | DC                      |
| <i>Parupeneus trifasciatus</i> Lacepède, 1801         | S                      | DC                      |
| <b>MURAENIDAE</b>                                     |                        |                         |
| <i>Echidna nebulosa</i> Ahl, 1789                     | S                      | NC                      |

| <b>FAMILIES - Species - Authors</b>                   | <b>Sighting Record</b> | <b>Trophic Category</b> |
|-------------------------------------------------------|------------------------|-------------------------|
| <i>Enchelycore pardalis</i> Temminck & Schlegel, 1846 | S                      | Pi                      |
| <i>Gymnomuraena zebra</i> Shaw, 1797                  | S                      | NC                      |
| <i>Gymnothorax breedeni</i> McCosker & Randall, 1977  | S                      | NC                      |
| <i>Gymnothorax eurostus</i> Abbott, 1860              | S                      | NC                      |
| <i>Gymnothorax favagineus</i> Bloch & Schneider, 1801 | S                      | NC                      |
| <i>Gymnothorax flavimarginatus</i> Rüppell, 1830      | S                      | Pi                      |
| <i>Gymnothorax griseus</i> Lacepède, 1803             | S                      | NC*                     |
| <i>Gymnothorax javanicus</i> Bleeker, 1859            | S                      | NC                      |
| <i>Gymnothorax meleagris</i> Shaw, 1795               | S                      | DC                      |
| <i>Gymnothorax miliaris</i> Kaup, 1856                | S                      | DC                      |
| <i>Gymnothorax nudivomer</i> Günther, 1867            | S                      | NC*                     |
| <i>Gymnothorax undulates</i> Lacepède, 1803           | S                      | NC                      |
| <i>Rhinomuraena quaesita</i> Garman, 1888             | P                      | Pi                      |
| <b>MYLIOBATIDAE</b>                                   |                        |                         |
| <i>Aetobatus narinari</i> Euphrasen, 1790             | P                      | DC                      |
| <i>Manta alfredi</i> Krefft, 1868                     | S                      | DPL                     |
| <i>Manta birostris</i> Walbaum, 1792                  | S                      | DPL                     |
| <i>Mobula japonica</i> Müller & Henle, 1841           | S                      | DPL                     |
| <b>ODONTASIPSIDAE</b>                                 |                        |                         |
| <i>Carcharias taurus</i> Rafinesque, 1810             | S                      | DC                      |
| <b>OPHICHTHIDAE</b>                                   |                        |                         |
| <i>Myrichthys colubrinus</i> Boddaert, 1781           | S                      | NC                      |
| <i>Myrichthys maculosus</i> Cuvier, 1816              | S                      | NC                      |
| <i>Pisodonophis cancrivorus</i> Richardson, 1848      | P                      | NC                      |
| <b>OPLEGNATHIDAE</b>                                  |                        |                         |
| <i>Oplegnathus robinsoni</i> Regan, 1916              | S                      | O                       |
| <b>OSTRACIIDAE</b>                                    |                        |                         |
| <i>Lactoria fornasini</i> Bianconi, 1846              | S                      | BSI*                    |
| <i>Lactoria cornuta</i> Linnaeus, 1758                | S                      | BSI                     |
| <i>Ostracion cubicus</i> Linnaeus, 1758               | S                      | BSI                     |
| <i>Ostracion meleagris</i> Shaw, 1796                 | S                      | BSI                     |
| <b>PEGASIDAE</b>                                      |                        |                         |
| <i>Eurypegasus draconis</i> Linnaeus, 1766            | S                      | BSI                     |
| <b>PEMPHERIDAE</b>                                    |                        |                         |
| <i>Parapriacanthus ransonneti</i> Steindachner, 1870  | S                      | NPL                     |

| <b>FAMILIES - Species - Authors</b>                      | <b>Sighting Record</b> | <b>Trophic Category</b> |
|----------------------------------------------------------|------------------------|-------------------------|
| <i>Pempheris schwenkii</i> Bleeker, 1855                 | S                      | NPL                     |
| PINGUIPEDIDAE                                            |                        |                         |
| <i>Parapercis schauinslandii</i> Steindachner, 1900      | S                      | DC                      |
| PLATYCEPHALIDAE                                          |                        |                         |
| <i>Papilloculiceps longiceps</i> Cuvier, 1829            | S                      | DC                      |
| PLOTOSIDAE                                               |                        |                         |
| <i>Plotosus lineatus</i> Thunberg, 1787                  | S                      | NC                      |
| POMACANTHIDAE                                            |                        |                         |
| <i>Apolemichthys trimaculatus</i> Cuvier, 1831           | S                      | O                       |
| <i>Centropyge acanthops</i> Norman, 1922                 | S                      | O                       |
| <i>Centropyge bispinosa</i> Günther, 1860                | S                      | O                       |
| <i>Centropyge multispinis</i> Playfair, 1867             | S                      | O                       |
| <i>Pomacanthus chrysurus</i> Cuvier, 1831                | S                      | O                       |
| <i>Pomacanthus imperator</i> Bloch, 1787                 | S                      | O                       |
| <i>Pomacanthus rhomboides</i> Gilchrist & Thompson, 1908 | S                      | O*                      |
| <i>Pomacanthus semicirculatus</i> Cuvier, 1831           | S                      | BSI                     |
| <i>Pygoplites diacanthus</i> Boddaert, 1772              | S                      | BSI                     |
| POMACENTRIDAE                                            |                        |                         |
| <i>Abudefduf natalensis</i> Hensley & Randall, 1983      | S                      | O                       |
| <i>Abudefduf sexfasciatus</i> Lacepède, 1801             | S                      | O                       |
| <i>Abudefduf vaigiensis</i> Quoy & Gaimard, 1825         | S                      | O                       |
| <i>Amphiprion allardi</i> Klausewitz, 1970               | S                      | O                       |
| <i>Amphiprion perideraion</i> Bleeker, 1855              | S                      | O*                      |
| <i>Chromis fieldi</i> Randall & DiBattista, 2013         | S                      | DPL                     |
| <i>Chromis nigrura</i> Smith, 1960                       | S                      | DPL                     |
| <i>Chromis opercularis</i> Günther, 1867                 | S                      | DPL                     |
| <i>Chromis viridis</i> Cuvier, 1830                      | S                      | O                       |
| <i>Chromis weberi</i> Fowler & Bean, 1928                | S                      | DPL                     |
| <i>Chrysiptera brownriggii</i> Bennett, 1828             | S                      | O                       |
| <i>Chrysiptera unimaculata</i> Cuvier, 1830              | S                      | O                       |
| <i>Dascyllus aruanus</i> Linnaeus, 1758                  | S                      | DPL                     |
| <i>Dascyllus carneus</i> Fischer, 1885                   | S                      | O                       |
| <i>Dascyllus trimaculatus</i> Rüppell, 1829              | S                      | DPL                     |
| <i>Neopomacentrus cyanomos</i> Bleeker, 1856             | S                      | NA                      |
| <i>Plectroglyphidodon dickii</i> Liénard, 1839           | S                      | O                       |



| <b>FAMILIES - Species - Authors</b>                 | <b>Sighting Record</b> | <b>Trophic Category</b> |
|-----------------------------------------------------|------------------------|-------------------------|
| <i>Pomacentrus caeruleus</i> Quoy & Gaimard, 1825   | S                      | O                       |
| <i>Pomacentrus pavo</i> Bloch, 1787                 | S                      | O                       |
| <i>Stegastes fasciolatus</i> Ogilby, 1889           | S                      | H                       |
| <i>Stegastes pelicierii</i> Allen & Emery, 1985     | S                      | H                       |
| <b>PRIACANTHIDAE</b>                                |                        |                         |
| <i>Priacanthus hamrur</i> Forsskål, 1775            | S                      | NC                      |
| <b>PSEUDOCHROMIDAE</b>                              |                        |                         |
| <i>Pseudochromis dutoiti</i> Smith, 1955            | S                      | DC                      |
| <b>RACHYCENTRIDAE</b>                               |                        |                         |
| <i>Rachycentron canadum</i> Linnaeus, 1766          | S                      | DC                      |
| <b>RHINCODONTIDAE</b>                               |                        |                         |
| <i>Rhincodon typus</i> Smith, 1828                  | S                      | DPL                     |
| <b>RHINIDAE</b>                                     |                        |                         |
| <i>Rhina ancylostoma</i> Bloch & Schneider, 1801    | P                      | NC                      |
| <b>RHINOBATIDAE</b>                                 |                        |                         |
| <i>Rhinobatus annulatus</i> Müller & Henle, 1841    | P                      | NC                      |
| <i>Rhinobatus leucospilus</i> Norman, 1926          | S                      | NC                      |
| <i>Rhynchobatus djiddensis</i> Forsskål, 1775       | S                      | NC                      |
| <b>SCARIDAE</b>                                     |                        |                         |
| <i>Chlorurus cyanescens</i> Valenciennes, 1840      | S                      | H                       |
| <i>Chlorurus sordidus</i> Forsskål, 1775            | S                      | H                       |
| <i>Scarus ghobban</i> Forsskål, 1775                | S                      | H                       |
| <i>Scarus rubroviolaceus</i> Bleeker, 1847          | S                      | H                       |
| <i>Scarus scaber</i> Valenciennes, 1840             | S                      | H                       |
| <i>Scarus tricolor</i> Bleeker, 1847                | S                      | H                       |
| <b>SCOMBRIDAE</b>                                   |                        |                         |
| <i>Euthynnus affinis</i> Cantor, 1849               | S                      | DC                      |
| <i>Gymnosarda unicolor</i> Rüppell, 1836            | S                      | Pi                      |
| <i>Katsuwonus pelamis</i> Linnaeus, 1758            | S                      | DC                      |
| <i>Scomberomorus commerson</i> Lacepède, 1801       | S                      | Pi                      |
| <i>Scomberomorus plurilineatus</i> Fourmanoir, 1966 | P                      | Pi                      |
| <i>Thunnus albacares</i> Bonnaterre, 1788           | S                      | DC                      |
| <b>SCORPAENIDAE</b>                                 |                        |                         |
| <i>Caracanthus maculatus</i> Gray, 1831             | S                      | NA                      |
| <i>Dendrochirus brachypterus</i> Cuvier, 1829       | S                      | NC                      |

| <b>FAMILIES - Species - Authors</b>                    | <b>Sighting Record</b> | <b>Trophic Category</b> |
|--------------------------------------------------------|------------------------|-------------------------|
| <i>Dendrochirus zebra</i> Cuvier, 1829                 | S                      | NC                      |
| <i>Parascorpaena mossambica</i> Peters, 1855           | S                      | NA                      |
| <i>Pterois antennata</i> Bloch, 1787                   | S                      | DC                      |
| <i>Pterois miles</i> Bennett, 1828                     | S                      | Pi                      |
| <i>Rhinopias eschmeyeri</i> Condé, 1977                | P                      | Pi*                     |
| <i>Rhinopias frondosa</i> Günther, 1892                | P                      | Pi                      |
| <i>Scorpaenopsis diabolus</i> Cuvier, 1829             | S                      | Pi                      |
| <i>Scorpaenopsis oxycephala</i> Bleeker, 1849          | S                      | Pi                      |
| <i>Scorpaenopsis venosa</i> Cuvier, 1829               | S                      | DC                      |
| <i>Sebastapistes cyanostigma</i> Bleeker, 1856         | S                      | NA                      |
| <i>Taenianotus triacanthus</i> Lacepède, 1802          | S                      | DC                      |
| <b>SERRANIDAE</b>                                      |                        |                         |
| <i>Cephalopholis argus</i> Schneider, 1801             | S                      | Pi                      |
| <i>Cephalopholis miniata</i> Forsskål, 1775            | S                      | NC                      |
| <i>Cephalopholis sonnerati</i> Valenciennes, 1828      | S                      | NC                      |
| <i>Epinephelus chlorostigma</i> Valenciennes, 1828     | S                      | NC                      |
| <i>Epinephelus fasciatus</i> Forsskål, 1775            | S                      | NC                      |
| <i>Epinephelus flavocaeruleus</i> Lacepède, 1802       | P                      | Pi                      |
| <i>Epinephelus lanceolatus</i> Bloch, 1790             | P                      | NC                      |
| <i>Epinephelus macrospilos</i> Bleeker, 1855           | S                      | DC                      |
| <i>Epinephelus malabaricus</i> Bloch & Schneider, 1801 | S                      | NC                      |
| <i>Epinephelus merra</i> Bloch, 1793                   | S                      | Pi                      |
| <i>Epinephelus rivulatus</i> Valenciennes, 1830        | S                      | Pi                      |
| <i>Epinephelus tauvina</i> Forsskål, 1775              | S                      | Pi                      |
| <i>Epinephelus tukula</i> Morgans, 1959                | S                      | NC                      |
| <i>Grammistes sexlineatus</i> Thunberg, 1792           | S                      | NC                      |
| <i>Nemanthias carberryi</i> Smith, 1954                | S                      | DPL                     |
| <i>Plectropomus punctatus</i> Quoy & Gaimard, 1824     | S                      | Pi                      |
| <i>Pogonoperca punctata</i> Valenciennes, 1830         | S                      | NC*                     |
| <i>Pseudanthias evansi</i> Smith, 1954                 | S                      | DPL                     |
| <i>Pseudanthias squamipinnus</i> Peters, 1855          | S                      | DPL                     |
| <b>SIGANIDAE</b>                                       |                        |                         |
| <i>Siganus luridus</i> Rüppell, 1829                   | S                      | H                       |
| <i>Siganus sutor</i> Valenciennes, 1835                | S                      | H                       |
| <b>SOLEIDAE</b>                                        |                        |                         |

| <b>FAMILIES - Species - Authors</b>                      | <b>Sighting Record</b> | <b>Trophic Category</b> |
|----------------------------------------------------------|------------------------|-------------------------|
| <i>Solea turbynei</i> Gilchrist, 1904                    | S                      | NA                      |
| <b>SPARIDAE</b>                                          |                        |                         |
| <i>Chrysoblephus puniceus</i> Gilchrist & Thompson, 1908 | S                      | DC                      |
| <i>Diplodus hottentotus</i> Smith, 1844                  | S                      | DC                      |
| <b>SPHRYNIDAE</b>                                        |                        |                         |
| <i>Sphyrna lewini</i> Griffith & Smith, 1834             | S                      | DC                      |
| <b>SPHYRAENIDAE</b>                                      |                        |                         |
| <i>Sphyraena putnamae</i> Jordan & Seale, 1905           | S                      | NC                      |
| <b>STEGOSTOMATIDAE</b>                                   |                        |                         |
| <i>Stegostoma fasciatum</i> Hermann, 1783                | S                      | NC                      |
| <b>SYNANCEIIDAE</b>                                      |                        |                         |
| <i>Synanceia verrucosa</i> Bloch & Schneider, 1801       | S                      | Pi                      |
| <b>SYNGNATHIDAE</b>                                      |                        |                         |
| <i>Corythoichthys intestinalis</i> Ramsay, 1881          | P                      | DC                      |
| <i>Doryrhamphus dactyliophorus</i> Bleeker, 1853         | S                      | DPL                     |
| <i>Hippocampus borboniensis</i> Duméril, 1870            | S                      | DPL*                    |
| <i>Hippocampus camelopardalis</i> Bianconi, 1854         | P                      | DPL*                    |
| <i>Hippocampus histrix</i> Kaup, 1856                    | S                      | DPL                     |
| <i>Hippocampus kuda</i> Bleeker, 1852                    | S                      | DPL                     |
| <i>Solenostomus cyanopterus</i> Bleeker, 1854            | S                      | DC                      |
| <i>Trachyrhamphus bicoarctatus</i> Bleeker, 1857         | S                      | NA                      |
| <b>SYNODONTIDAE</b>                                      |                        |                         |
| <i>Synodus dermatogenys</i> Fowler, 1912                 | S                      | Pi                      |
| <i>Synodus jaculum</i> Russell & Cressey, 1979           | S                      | Pi                      |
| <b>TETRAODONTIDAE</b>                                    |                        |                         |
| <i>Arothron hispidus</i> Linnaeus, 1758                  | S                      | NC                      |
| <i>Arothron meleagris</i> Anonymous, 1798                | S                      | NC                      |
| <i>Arothron nigropunctatus</i> Bloch & Schneider, 1801   | S                      | NC                      |
| <i>Arothron stellatus</i> Anonymous, 1798                | S                      | NC                      |
| <i>Canthigaster amboinensis</i> Bleeker, 1864            | S                      | H                       |
| <i>Canthigaster bennetti</i> Bleeker, 1854               | S                      | O                       |
| <i>Canthigaster janthinoptera</i> Bleeker, 1855          | S                      | O                       |
| <i>Canthigaster smithae</i> Allen & Randall, 1977        | S                      | O*                      |
| <i>Canthigaster solandri</i> Richardson, 1845            | S                      | O                       |
| <i>Canthigaster valentine</i> Bleeker, 1853              | S                      | O                       |

| <b>FAMILIES - Species - Authors</b>       | <b>Sighting Record</b> | <b>Trophic Category</b> |
|-------------------------------------------|------------------------|-------------------------|
| <b>TETRAROGIDAE</b>                       |                        |                         |
| <i>Ablabys binotatus</i> Peters, 1855     | S                      | NA                      |
| <i>Ablabys macracanthus</i> Bleeker, 1852 | S                      | NA                      |
| <b>TORPEDINIDAE</b>                       |                        |                         |
| <i>Torpedo marmorata</i> Risso, 1810      | S                      | Pi                      |
| <i>Torpedo spp.</i>                       | S                      | Pi                      |
| <b>ZANCLIDAE</b>                          |                        |                         |
| <i>Zanclus cornutus</i> Linnaeus, 1758    | S                      | DC                      |

**Trophic Categories: Herbivore (H); Omnivore (O); Browser of Sessile Invertebrates (BSI); Diurnal Carnivore (DC); Nocturnal Carnivore (NC); Piscivore (Pi); Diurnal Planktivore (DPL); Nocturnal Planktivore (NPL); Unknown (NA)**

141

142 Twelve families represented over half of the total recorded diversity, these included  
 143 Acanthuridae (17), Balistidae (11), Carangidae (10), Chaetodontidae (18), Holocentridae  
 144 (10), Labridae (32), Lutjanidae (12), Muraenidae (14), Pomacentridae (21), Scorpaenidae  
 145 (13), Serranidae (19), and Tetraodontidae (10). Nearly half the recorded families (48%) were  
 146 represented by one species only. Five of these families are monospecific including,  
 147 Rachycentridae, Rhinodontidae, Rhinidae, Stegostomatidae, and Zanclidae. The most  
 148 species-rich genera were *Chaetodon* (12), *Epinephelus* (10) and *Gymnothorax* (10).

149

## 150 Discussion

151 This is the first assessment of ichthyofaunal diversity of the seas around Praia do Tofo and  
 152 Praia da Barra in southern Mozambique. Through the use of underwater observations  
 153 supplemented by past records, 353 species were recorded from the coral reefs spanning 40  
 154 km of the southern coastline of the Inhambane province. These results provide a higher  
 155 estimation of fish species richness than is predicted by the Coral Fish Diversity Index. The  
 156 diversity of the PTPB area is similar to that recorded in other areas of the southwestern Indian  
 157 Ocean where visual observations have been the primary data collection method (Table 3)

158 (Maggs *et al.*, 2010; Chabanet & Durville, 2005; Gillibrand, Harries & Mara, 2007; Durville,

**Table 3.** The diversity of reef fish species and families from other areas in the southwestern Indian Ocean. SR<sub>obs</sub> = recorded species richness; SR<sub>theor</sub> = theoretical species richness predicted by the Coral Fish Diversity Index (Allen & Werner, 2002).

| Location                             | Geographical Coordinates | SR <sub>obs</sub> | SR <sub>theor</sub> | No. of families | SR <sub>obs</sub> to no. of families ratio (2 d. p.) | Source                            |
|--------------------------------------|--------------------------|-------------------|---------------------|-----------------|------------------------------------------------------|-----------------------------------|
| Praia do Tofo & Praia da Barra       | 23°51'S, 33°54'E         | 353               | 329                 | 79              | 4.47:1                                               | Present study                     |
| Bazaruto Archipelago National Park   | 21°43'S, 35°27'E         | 249               | 359                 | 40              | 6.23:1                                               | Maggs <i>et al.</i> 2010          |
| Maputo Bay                           | 26°S, 32°54'E            | 327               | 349                 | 58              | 5.64:1                                               | Schleyer & Pereira, 2014          |
| Juan de Nova                         | 17°03'S, 42°43'E         | 299               | 423                 | 55              | 5.44:1                                               | Chabanet & Durville, 2005         |
| Andavadoaka                          | 22°05'S, 43°12'E         | 334               | 430                 | 58              | 5.76:1                                               | Gillibrand, Harries & Mara, 2007  |
| Glorieuses Islands                   | 11°33'S, 47°20'E         | 332               | 451                 | 57              | 5.82:1                                               | Durville, Chabanet & Quod, 2003   |
| St. Lucia Marine Reserve             | 27°44'S, 32°40'E         | 258               | 349                 | 48              | 5.38:1                                               | Floros <i>et al.</i> 2012         |
| Mafia Island                         | 7°52'S, 39°45'E          | 394               | 515                 | 56              | 7.04:1                                               | Garpe & Ohman, 2003               |
| Europa Island                        | 22°21'S, 40°21'E         | 389               | 468                 | 62              | 6.27:1                                               | Fricke <i>et al.</i> 2013         |
| Ponta do Ouro Partial Marine Reserve | 26°27'S, 32°56'E         | 376               | 318                 | 90              | 4.18:1                                               | Pereira, Videira & Abrantes, 2004 |

159 Chabanet & Quod, 2003). In particular, SR<sub>theor</sub> shows high similarity to areas in southern  
 160 Mozambique and South Africa that are fully or partially protected (e.g. Floros *et al.* 2012;  
 161 Maggs *et al.* 2010; Pereira, Videira & Abrantes, 2004).

162 The sub-tropical reefs of the PTPB area have levels of coral cover (Motta *et al.* 2002), which  
 163 may be assumed to result in a low diversity of fish communities (Komyakova, Munday &  
 164 Jones, 2013). However, the current study finds a relatively high ichthyofaunal species  
 165 richness which is comparable to areas with higher coral cover (e.g. Gillibrand, Harries &  
 166 Mara, 2007; Table 3). This may be partly explained by the extensive visual sampling design  
 167 used. The high sampling time employed in this study (over 36 hours of underwater  
 168 observations) allowed for the observation of some cryptic species that would be missed by

169 shorter visual surveying. For example, four species of gobies and eight species of blennies  
170 were recorded on reefs of PTPB (Table 2). Therefore while visual censuses generally do not  
171 accurately capture the diversity of cryptobenthic species (Ackerman & Bellwood, 2000) this  
172 limitation can be reduced. A high number of families were also recorded in comparison to  
173 other areas in the region (Table 3), suggesting a high proportion of uncommon species were  
174 observed. The impact of greater sampling effort on species records is evident in the results of  
175 Gillibrand, Harries & Mara (2007). These authors examined a smaller area than the current  
176 study and recorded 334 species by conducting visual observations across a twelve month  
177 period. In contrast, Chabanet and Durville (2005) recorded more than 50 fewer species  
178 around Juan de Nova island through 30 hours of visual surveying. This highlights that  
179 sampling effort does not solely account for the high fish diversity recorded in the PTPB area.

180

181 The present study necessarily examined a large depth range (1-32 m) in order to capture the  
182 range of habitats present in the area. As such a higher number of specialist species are  
183 expected to have been identified due to the wider variety of physical habitats and biological  
184 conditions (Bridge *et al.* 2016; Jankowski, Graham & Jones, 2015), Significant changes in  
185 fish assemblages with depth have been observed in previous studies (e.g. Friedlander &  
186 Parrish, 1998) and this is likely to be the same in the current study. This may also explain the  
187 high number of families observed (Table 3).

188

189 Coastal upwelling in these seas drives high levels of primary productivity and in turn  
190 supports abundant populations of large charismatic species (Rohner *et al.* 2014). It is also  
191 likely to influence the reef fish diversity of the area, potentially boosting species richness in  
192 two ways. Firstly, cooler waters allow the area to support species more common in temperate  
193 waters (e.g. *Seriola lalandi*, *Oplegnathus robinsoni*). Anderson *et al.* (2015) proposed the

194 appearance of species characteristic of higher latitudes in their sub-tropical study site to  
195 regions of cool water upwelling. In the current study water temperatures were recorded  
196 between 18-29°C and the influx of cool water may also influence diversity in the sub-tropical  
197 PTPB area. Secondly, upwelling supports high plankton abundance which can reduce  
198 competitive exclusion in planktivorous species (Abrams, 1995). This would allow the co-  
199 existence of more species on lower trophic levels, an effect which may then propagate up the  
200 food chain to produce a higher diversity of secondary and tertiary consumers. The  
201 relationship between primary productivity and diversity has been previously acknowledged  
202 (Waide *et al.* 1999).

203

204 This study demonstrates the PTPB area's biological value beyond its resident megafauna  
205 populations, and the future for a broader value of ecotourism to the region. Whilst the  
206 relatively large sampling extent precludes comprehensive comparisons with other studies in  
207 the southwestern Indian Ocean, the results show that the coral reef ecosystem of PTPB hosts  
208 a reef fish community comparable to more isolated or protected areas. As such the current  
209 study suggests that the reefs of PTPB are in good condition, despite the large associated  
210 human population. Targeted research is needed to examine the current health status of these  
211 reefs and to provide a baseline for monitoring impacts of future expansion of tourism and  
212 fishing activities in the region.

213

#### 214 Acknowledgements

215 I would like to thank Peri Peri dive centre and the Underwater Africa volunteer program for  
216 their support in undertaking both SCUBA and snorkel surveys. Sincere thanks to Dr Tracy  
217 Ainsworth, Dr William Leggat, Dr Hudson Pinheiro and an anonymous reviewer for

218 comments on and improvements to the manuscript. Finally, thank you to all those friends and  
219 strangers who provided photographic evidence of rare species.

220

## 221 References

222 Abrams PA. 1995. Monotonic or unimodal diversity-productivity gradients: what does  
223 competition theory predict? *Ecology*, 76: 2019-2027. DOI: 10.2307/1941677

224 Ackerman JL & Bellwood DR. 2000. Reef fish assemblages: a re-evaluation using enclosed  
225 rotenone stations. *Marine Ecology Progression Series*, 206: 227-237.

226 Allen GR & Werner TB. 2002. Coral reef fish assessment in the 'coral triangle' of  
227 southeastern Asia. *Environmental Biology of Fishes*, 65: 209-214. DOI:  
228 10.1023/A:1020093012502

229 Anderson AB, Carvalho-Filho A, Morais RA, Nunes LT, Quimbayo JP & Floeter SR. 2015.  
230 Brazilian tropical fishes in their southern limit of distribution: checklist of Santa Catarina's  
231 rocky reef ichthyofauna, remarks and new records. *Check List*, 11: art1688. DOI:  
232 10.15560/11.4.1688

233 Bellwood DR & Hughes, TP. 2001. Regional-scale assembly rules and biodiversity of coral  
234 reefs. *Science*, 292: 1532 – 1534.

235 Bridge TCL, Luiz OJ, Coleman RR, Kane CN & Kosaki RK. 2016. Ecological and  
236 morphological traits predict depth-generalist fishes on coral reefs. *Proceedings of the Royal  
237 Society B*, 283: 20152332. DOI: 10.1098/rspb.2015.2332

238 Chabanet P & Durville P. 2005. Reef fish inventory of Juan de Nova's natural park (Western  
239 Indian Ocean). *Western Indian Ocean Journal of Marine Science*, 4: 145-162. DOI:  
240 10.4314/wiojms.v4i2.28484

241 Chabanet P, Tessier E, Durville P, Mulochau T & René F. 2002. Fish communities of the  
242 Geyser and Zélée coral banks (Western Indian Ocean). *Cybium*, 26: 11-26.



- 243 Cleland EE. 2011. Biodiversity and ecosystem stability. *Nature Education Knowledge*, 3: pp.  
244 14.
- 245 Durville P, Chabanet P & Quod JP. 2003. Visual census of the reef fishes in the natural  
246 reserve of the Glorieuses Islands (Western Indian Ocean). *Western Indian Ocean Journal of*  
247 *Marine Science*, 2: 95-104.
- 248 Floros C, Schleyer M, Maggs JQ & Celliers, L. 2012. Baseline assessment of high-latitude  
249 coral reef fish communities in southern Africa. *African Journal of Marine Science*, 34: 55-69.  
250 DOI: 10.2989/1814232X.2012.673284
- 251 Friedlander AM & Parrish JD. 1998. Habitat characteristics affecting fish assemblages on a  
252 Hawaiian coral reef. *Journal of Experimental Marine Biology and Ecology*, 224: 1 – 30. DOI:  
253 10.1016/S0022-0981(97)00164-0
- 254 Garpe KC & Öhman MC. 2003. Coral and fish distribution patterns in Mafia Island Marine  
255 Park, Tanzania: fish-habitat interactions. *Hydrobiologia*, 498: 191-211. DOI:  
256 10.1023/A:1026217201408
- 257 Gillibrand CJ, Harries AR & Mara E. 2007. Inventory and Spatial Assemblage Study of Reef  
258 Fish in the Area of Andavadoaka, South-West Madagascar (Western Indian Ocean). *Western*  
259 *Indian Ocean Journal of Marine Science*, 6: 183-197. DOI: 10.14314/wiojms.v6i2.48239
- 260 Harmelin-Vivien ML. 1979. Ichtyofaune des récifs coralliens en France Outre-Mer. *ICRI*.  
261 Doc. Secrétariat d'Etat à l'Outre-Mer et Ministère de l'Aménagement du Territoire et de  
262 l'Environnement. pp 136.
- 263 Hiatt WR & Strasberg DW. 1960. Ecological relationship of the fish fauna on coral reefs of  
264 the Marshall Islands. *Ecological Monograph*, 30: 65-127
- 265 Hobson ES. 1974. Feeding relationships of teleostean fish on coral reefs in Kona, Hawaii.  
266 *Fish Bulletin*, 72: 915-1031

- 267 Instituto Nacional de Estatística. 2007. Recenseamento Geral da População e Habitação,  
268 Indicadores Socio-Demográficos: Província da Inhambane. *3<sup>o</sup> Censo Geral da População e*  
269 *Habitação*: pp. 5.
- 270 Jankowski MW, Graham NAJ & Jones GP. 2015. Depth gradients in diversity, distribution  
271 and habitat specialisation in coral reef fishes: implications for the depth-refuge hypothesis.  
272 *Marine Ecology Progression Series*, 540: 203-215. DOI: 10.3354/meps11523
- 273 Komyakova V, Munday PL & Jones GP. 2013. Relative Importance of Coral Cover, Habitat  
274 Complexity and Diversity in Determining the Structure of Reef Fish Communities. *PLoS*  
275 *One*, 8: e83178. DOI: 10.1371/journal.pone.0083178
- 276 Kulbicki M. 1988. Patterns in the trophic structure of fish populations across the SW lagoon  
277 of New Caledonia. *Proceedings of the 6<sup>th</sup> International Coral Reef Symposium*, Townsville,  
278 Australia (August 8-12), 2: 305-312.
- 279 Maggs JQ, Floros C, Pereira MAM. & Schleyer MH. 2010. Rapid Visual Assessment of Fish  
280 Communities on Selected Reefs in the Bazaruto Archipelago. *Western Indian Ocean Journal*  
281 *of Marine Science*, 9; 115-134.
- 282 Motta H, Pereira MAM, Gonçalves M, Ridgway T & Schleyer MH. 2002. Coral reef  
283 monitoring in Mozambique (2000). *MICOA/CORDIO/ORI/WWF*. Maputo, Mozambique  
284 Coral Reef Management Programme.
- 285 Mutimucuo M & Meyer D. 2011. Pro-poor employment and procurement: a tourism value  
286 chain analysis of Inhambane peninsula, Mozambique. In: van der Duim R, Meyer D,  
287 Saarinen J & Zellmer K (eds.). *New alliances for tourism, conservation and development in*  
288 *Eastern and Southern Africa*. Eburon, Delft.
- 289 Myers RF. 1999. *Micronesian reef fishes*. Guam: Coral Graphics. 298pp.
- 290 Pereira MAM. 2000. Preliminary checklist of reef-associated fishes of Mozambique. *MICOA*,  
291 Maputo, pp. 21.

- 292 Pierce SJ, Méndez-Jiménez A, Collins K, Rosero-Caicedo M & Monadjem A. 2010.  
293 Developing a Code of Conduct for whale shark interactions in Mozambique. *Aquatic*  
294 *Conservation: Marine and Freshwater Ecosystems*, 20: 782-788. DOI: 10.1002/aqc.1149
- 295 Rohner CA, Pierce SJ, Marshall AD, Weeks SJ, Bennett MB & Richardson AJ. 2013. Trends  
296 in sightings and environmental influences on a coastal aggregation of manta rays and whale  
297 sharks. *Marine Ecology Progression Series*, 482: 153-168. DOI: 10.3354/meps10290
- 298 Rohner CA, Weeks SJ, Richardson AJ, Pierce SJ, Magno-Canto MM, Feldman GC, Cliff G  
299 & Roberts MJ. 2014. Oceanographic influences on a global whale shark hotspot in southern  
300 Mozambique. *PeerJ PrePrints*, 2:e661v1. DOI: 10.7287/peerj.preprints.661v1
- 301 Schleyer MH & Celliers L. 2005. The coral reefs of Bazaruto Island, Mozambique, with  
302 recommendations for their management. *Western Indian Ocean Journal of Marine Science*,  
303 4: 227-236. DOI: 10.4314/wiojms.v4i2.28492
- 304 Tibiriçá Y, Birtles A, Valentine P & Miller DK. 2011. Diving Tourism in Mozambique: An  
305 Opportunity at Risk? *Marine Environments*, 7: 141-151. DOI:  
306 10.3727/154427311X13195453162732
- 307 United Nations & World Heritage Convention. 2014. Assessing marine world heritage from  
308 an ecosystem perspective. *The Western Indian Ocean*, UN: 71-92 pp
- 309 Van der Elst RP & Everett BI. 2015. *Offshore fisheries of the Southwest Indian Ocean: their*  
310 *status and the impact on vulnerable species*. Oceanographic Research Institute, Special  
311 Publication, 10: 448pp.
- 312 Venables S, Winstanley G, Bowles L & Marshall AD. 2016. A giant opportunity: the  
313 economic impact of manta rays on the Mozambican tourism industry – an incentive for  
314 increased management and protection. *Tourism in Marine Environments*, 12: 51-68. DOI:  
315 10.3727/154427316X693225

- 316 Waide RB, Willig MR, Steiner CF, Mittelbach G, Gough L, Dodson SI, Juday GP &  
317 Parmenter R. 1999. The relationship between productivity and species richness. *Annual*  
318 *Review of Ecology and Systematics*, 30: 257-300.
- 319 Watson M, Righton D, Austin T & Ormond R.1996. The effects of fishing on coral reef  
320 abundance and diversity. *Journal of the Marine Biological Association of the United*  
321 *Kingdom*, 76: 29-233. DOI: 10.1017/S0025315400029179
- 322 Wickel J, Jamon A, Pinault M, Durville P & Chabanet P. 2014. Species composition and  
323 structure of marine fish communities of Mayotte Island (south-western Indian Ocean).  
324 *Cybium*, 38: 179-203. DOI: 10.1016/j.biocon.2013.12.029 0006-3207
